# Supplementary material
Source: PubMed Central journal article supplement (PMC5856541)
Supplement: pnas.201718833SI.pdf [file pnas.201718833SI.pdf]

# Supporting Information

Simmet et al. 10.1073/pnas.1718833115

| Exon | Wildtype                                                                                                                                                            | <i>OCT4KO<sup>tm1</sup></i>                                                                                                                                         |
|------|---------------------------------------------------------------------------------------------------------------------------------------------------------------------|---------------------------------------------------------------------------------------------------------------------------------------------------------------------|
| 1    | MAGHLASDFAFSPPPGGGGDGPGGPEPGWVD<br>PRTWMSFQGGPPGGSGIGPVVPGA <del>EVWGLPPC</del><br>PPPYDLGGGMAYCAPQVGVGPVPPGGLETPQP<br>EGEAGAGVESNSEGASDPDCAAPAGAPKLDKEK<br>LEPNPEE | MAGHLASDFAFSPPPGGGGDGPGGPEPGWVD<br>PRTWMSFQGGPPGGSGIGPVVPGA <del>EVWGLPPC</del><br>PPPYDLGGGMAYCAPQVGVGPVPPGGLETPQP<br>EGEAGAGVESNSEGASDPDCAAPAGAPKLDKEK<br>LEPNPEE |
| 2    | SQDIKALQKDL <del>EQFAKLLKQKRITLGYTQADVGLT</del><br>LGVLF <del>G</del>                                                                                               | SQDIKALQKDL <del>EQFAKLLKQKRITLGY</del> <u><i>PRPMWGS</i></u><br><i>PWGFSL</i>                                                                                      |
| 3    | KVFSQTTICRF <del>EALQLSFKNMCKLRPLLQKWVEE</del><br>ADNNENLQE                                                                                                         | <i>ERCSAKRLSAVLR</i> LCSSVSR <del>TCVSCGPCCRSGWRK</del><br><i>LTTTRICRR</i>                                                                                         |
| 4    | ICKAETLVQARKRRKRTSIENRV <del>RGNLES</del> MFLQCPK<br>PTLQQISHIAQQQLGLEKD                                                                                            | <i>YARQRPLCRPERESGRVSRTE*</i>                                                                                                                                       |
| 5    | VVRVWFCNRRQK <del>GKRSSSDYSQRED</del> FEAAGSPF<br>TGGPVSSPLAPGPHFGTPCYGGPHFTLYSSVPF<br>PEGEVFPSSVTALGSPMHAN*                                                        |                                                                                                                                                                     |

**Fig. S1.** Predicted amino acid sequence of OCT4 protein in wild-type and *OCT4KO<sup>tm1</sup>*. Frameshift mutation in exon 2 of *OCT4KO<sup>tm1</sup>* is indicated by italics and underlined proline; asterisks represent termination codons. In exon 4, a premature termination codon 91 bp upstream the following exon–exon junction was introduced by homozygous deletion of 1 bp in exon 2, which is expected to result in nonsense-mediated decay of the mRNA (20).





**Table S1. Primers used for mutation screening**

| Primer    | Sequence                     |
|-----------|------------------------------|
| OCT4 2f   | 5'-TTGTGGGACCTTCAAAGTAATC-3' |
| OCT4 2r*  | 5'-CTGCAGATTCTCGTTGTTGT-3'   |
| OCT4 12f* | 5'-TATGTTCTTACATATCCTCTGC-3' |
| ETF1 2f   | 5'-TTGGGTGTGAAGTGGGTTTG-3'   |
| ETF1 2r*  | 5'-CTGGGCGATGTGGCTAATTT-3'   |
| ETF1 3f*  | 5'-CTATGACTTGTGGAGGGATG-3'   |

\*Primer used for Sanger sequencing.

## Other Supporting Information Files

[Dataset S1 \(XLSX\)](#)
